# Supplementary material for: Composites hybridized with Ca(OH)2 and LaMnO3 synergistically improve phosphate adsorption properties
Source: Royal Society of Chemistry journal article supplement (doi:10.1039/d3nj04596j), 2024-01-01
Supplement: d3nj04596j1.pdf [file d3nj04596j1.pdf]

## Supplementary Material

### Composites hybridized with $\text{Ca}(\text{OH})_2$ and $\text{LaMnO}_3$ synergistically improve phosphate adsorption properties

Menghan Feng<sup>a,b</sup>, Mengmeng Li<sup>a,b</sup>, Changbin Guo<sup>a,b,c</sup>, Xueyan Zhang<sup>a,b</sup>, Tian Yuan<sup>a,b,d</sup>, Keqiang Zhang<sup>a</sup>, Feng Wang<sup>a,b,\*</sup>

<sup>a</sup> Agro-Environmental Protection Institute, Ministry of Agriculture and Rural Affairs, Tianjin 300191, China

<sup>b</sup> Dali Comprehensive Experimental Station of Environmental Protection Research and Monitoring Institute, Ministry of Agriculture and Rural Affairs (Dali Original Seed Farm), Dali 671004, China

<sup>c</sup> College of Grass industry and Environmental Science, Xinjiang Agricultural University, Urumqi 830052, China

<sup>d</sup> College of Resources and Environment, Shanxi Agricultural University, Jinzhong 030801, China

\* Corresponding author: [wangfeng\\_530@163.com](mailto:wangfeng_530@163.com) (F. W).

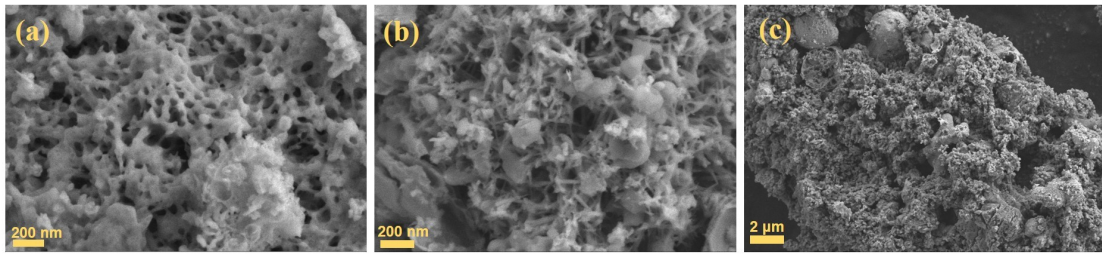

## Section A. *Experimental*

Fig. S1  $\text{Ca}_0\text{-LMO}$ (a),  $\text{Ca}_{0.4}\text{-LMO}$ (b),  $\text{Ca}_{0.7}\text{-LMO}$ (c) images magnified by SEM
